# Supplementary material
Source: PubMed Central journal article supplement (PMC7875483)
Supplement: NIHMS1662901-supplement-Supplementary_Tables.pdf [file NIHMS1662901-supplement-Supplementary_Tables.pdf]

**Supplementary Tables:**

**Table S1. Distribution of Facial Angiofibromas in Patients with Mosaic Tuberous Sclerosis Complex.**

| <b>P#</b> | <b>Mosaic Subtype</b> | <b>Total<sup>a</sup></b> | <b>L</b> | <b>R</b> | <b>Predominance</b> |
|-----------|-----------------------|--------------------------|----------|----------|---------------------|
| 20        | Asym                  | 10                       | 0        | 10       | 100%                |
| 40        | Asym                  | 43                       | 40       | 3        | 93%                 |
| 49        | Asym                  | 49                       | 4        | 45       | 92%                 |
| 31        | Asym                  | 10                       | 1        | 9        | 90%                 |
| 33        | Asym                  | 32                       | 6        | 26       | 81%                 |
| 29        | Asym                  | 33                       | 8        | 25       | 76%                 |
| 25        | Asym                  | 91                       | 68       | 23       | 75%                 |
| 3         | Sym                   | 126                      | 58       | 68       | 54%                 |
| 39        | Sym                   | 19                       | 9        | 10       | 53%                 |
| 19        | Sym                   | 92                       | 49       | 43       | 53%                 |
| 21        | Sym                   | 368                      | 173      | 195      | 53%                 |
| 10        | Sym                   | 17                       | 8        | 9        | 53%                 |
| 14        | Sym                   | 50                       | 24       | 26       | 52%                 |
| 11        | Sym                   | 271                      | 131      | 140      | 52%                 |
| 12        | Sym                   | 72                       | 37       | 35       | 51%                 |
| 5         | Sym                   | 386                      | 189      | 197      | 51%                 |
| 30        | Sym                   | 14                       | 7        | 7        | 50%                 |
| 32        | Sym                   | 6                        | 3        | 3        | 50%                 |
| 4         | Sym                   | 600+                     | 300+     | 300+     | 50%                 |

<sup>a</sup>Total number of angiofibromas on the nose and cheeks.

Abbreviations: L, Left; R, Right; Asym, Asymmetrical; Sym, Symmetrical.

**Table S2. The Median Number of Mucocutaneous, Internal, and Total Findings Differs Between Patients with Germline Disease, Symmetrical-Angiofibroma Mosaicism, and Asymmetrical-Angiofibroma Mosaicism.**

|                | Germline<br>(G)     | Sym-AF<br>Mosaic<br>(Sym) | Asym-AF<br>Mosaic<br>(Asym) | P-Values     |                  |                 |
|----------------|---------------------|---------------------------|-----------------------------|--------------|------------------|-----------------|
|                |                     |                           |                             | G vs.<br>Sym | G vs.<br>Asym    | Sym vs.<br>Asym |
| MCF (8 Max)    | 6 (1 – 8)<br>n=28   | 4 (2 – 6)<br>n=12         | 1 (1 – 4)<br>n=7            | <b>0.001</b> | <b>&lt;0.001</b> | <b>0.002</b>    |
| IF (5 Max)     | 4 (2 – 5)<br>n=26   | 4 (0 – 5)<br>n=12         | 3 (1 – 3)<br>n=7            | 0.920        | <b>0.003</b>     | <b>0.012</b>    |
| Total (13 Max) | 10 (8 – 12)<br>n=25 | 8 (3 – 11)<br>n=12        | 4 (3 – 7)<br>n=7            | <b>0.004</b> | <b>&lt;0.001</b> | <b>0.004</b>    |

Abbreviations: MCF, Mucocutaneous Findings; IF, Internal Findings; Sym-AF, Symmetrical-Angiofibroma; Asym-AF, Asymmetrical-Angiofibroma.

Data displayed as median (range). Bold text indicates significant p-values <0.05. P-values were determined using Mann-Whitney test. A finding was defined as present if sufficient to meet diagnostic criteria (AF $\geq$ 3, HM $\geq$ 3, UF $\geq$ 2, DP  $\geq$ 3, and OF $\geq$ 2).

**Table S3. Characteristics of Patients with Asymmetrical-Angiofibroma Mosaicism, Symmetrical-Angiofibroma Mosaicism, or Germline Tuberous Sclerosis Complex.**

|                               | Germline (G) | Sym-AF Mosaic (Sym) | Asym-AF Mosaic (Asym) | P-Values     |                  |              |
|-------------------------------|--------------|---------------------|-----------------------|--------------|------------------|--------------|
|                               |              |                     |                       | G vs. Sym    | G vs. Asym       | Sym vs. Asym |
| <b>MUCOCUTANEOUS</b>          |              |                     |                       |              |                  |              |
| HM                            | 28/29 (97%)  | 10/12 (83%)         | 2/7 (29%)             | 0.200        | <b>&lt;0.001</b> | <b>0.045</b> |
| FCP                           | 19/29 (66%)  | 4/12 (33%)          | 1/7 (14%)             | 0.087        | <b>0.030</b>     | 0.600        |
| SP                            | 15/29 (52%)  | 8/12 (67%)          | 0/7 (0%)              | 0.497        | <b>0.027</b>     | <b>0.013</b> |
| UF                            | 29/29 (100%) | 9/12 (75%)          | 1/7 (14%)             | <b>0.021</b> | <b>&lt;0.001</b> | <b>0.012</b> |
| AF                            | 27/29 (93%)  | 12/12 (100%)        | 7/7 (100%)            | 1            | 1                | 1            |
| Confetti                      | 10/29 (34%)  | 3/12 (25%)          | 1/7 (14%)             | 0.719        | 0.400            | 1            |
| DP                            | 27/29 (93%)  | 7/12 (58%)          | 4/7 (57%)             | <b>0.016</b> | <b>0.040</b>     | 1            |
| OF                            | 24/28 (86%)  | 4/12 (33%)          | 3/7 (43%)             | <b>0.002</b> | <b>0.034</b>     | 1            |
| <b>NEUROLOGICAL</b>           |              |                     |                       |              |                  |              |
| Tuber                         | 28/28 (100%) | 10/12 (83%)         | 6/7 (86%)             | 0.084        | 0.200            | 1            |
| SEN                           | 20/26 (77%)  | 8/12 (67%)          | 0/7 (0%)              | 0.694        | <b>&lt;0.001</b> | <b>0.013</b> |
| SEGA                          | 5/26 (19%)   | 3/12 (25%)          | 0/7 (0%)              | 1            | 0.559            | 0.263        |
| RH                            | 10/17 (59%)  | 3/10 (30%)          | 1/7 (14%)             | 0.237        | 0.078            | 0.603        |
| Seizure                       | 14/29 (48%)  | 3/12 (25%)          | 1/7 (17%)             | 0.296        | 0.200            | 1            |
| <b>PULMONARY &amp; RENAL</b>  |              |                     |                       |              |                  |              |
| LAM                           | 23/29 (79%)  | 11/12 (92%)         | 5/7 (71%)             | 0.651        | 0.639            | 0.523        |
| Pneumothorax <sup>a</sup>     | 11/23 (48%)  | 6/11 (55%)          | 2/5 (40%)             | 1            | 1                | 1            |
| AML                           | 25/29 (86%)  | 11/12 (92%)         | 6/7 (85%)             | 1            | 1                | 1            |
| PKD                           | 2/29 (7%)    | 0/12 (0%)           | 0/7 (0%)              | 1            | 1                | 1            |
| Nephrectomy <sup>b</sup>      | 9/26 (34%)   | 3/11 (27%)          | 2/6 (33%)             | 1            | 1                | 1            |
| Renal Transplant <sup>b</sup> | 2/26 (8%)    | 0/11 (0%)           | 0/6 (0%)              | 1            | 1                | 1            |
| Embolization <sup>b</sup>     | 3/26 (12%)   | 3/11 (27%)          | 4/6 (67%)             | 0.335        | <b>0.012</b>     | 0.162        |

<sup>a</sup> Patients with LAM and a history of pneumothorax

<sup>b</sup> Patients with AML or PKD and a history of renal procedure

Bold text indicates significant p-values <0.05.

A finding was counted as present if at least one lesion of that type was seen.

Columns show the number of patients with the findings divided by the total number of patients tested, followed by the percent positive in parentheses.

Abbreviations: Sym-AF, Symmetrical-Angiofibroma; Asym-AF, Asymmetrical-Angiofibroma; HM, Hypomelanotic Macule; FCP, Fibrous Cephalic Plaque; SP, Shagreen Patch; Ungual Fibroma, UF; AF, Angiofibroma; DP, Dental Pitting; OF, Oral Fibroma; SEN, Subependymal Nodule; SEGA, Subependymal Giant Cell Astrocytoma; RH, Retinal Hamartoma; LAM, Lymphangioliomyomatosis; AML, Angiomyolipoma; PKD, Polycystic Kidney Disease.

**Table S4. Pulmonary Function and Cyst Burden in Patients with LAM and Asymmetrical-Angiofibroma Mosaicism, Symmetrical-Angiofibroma Mosaicism, or Germline Tuberous Sclerosis Complex.**

|            | Germline (G)         | Sym-AF<br>Mosaic<br>(Sym) | Asym-AF<br>Mosaic (Asym) | P-values     |               |                 |
|------------|----------------------|---------------------------|--------------------------|--------------|---------------|-----------------|
|            |                      |                           |                          | G vs.<br>Sym | G vs.<br>Asym | Sym vs.<br>Asym |
| %FEV1      | 98 (22-129)<br>n= 23 | 92 (36-120)<br>n= 11      | 87 (47-106)<br>n= 5      | <i>0.987</i> | <i>0.586</i>  | <i>0.553</i>    |
| %DLCO      | 87 (16-139)<br>n= 23 | 84 (51-114)<br>n= 11      | 88 (50-106)<br>n= 5      | <i>0.567</i> | <i>0.559</i>  | <i>0.805</i>    |
| Cyst Score | 3.8 (0-37)<br>n= 17  | 5.1 (0-36)<br>n= 10       | 5.0 (1-18)<br>n= 5       | <i>0.809</i> | <i>0.611</i>  | <i>0.751</i>    |

Abbreviations: Sym-AF, Symmetrical-Angiofibroma; Asym-AF, Asymmetrical-Angiofibroma; %FEV1, Forced Expiratory Volume in One Second (% Predicted); %DLCO, Diffusion Capacity of the Lung for Carbon Monoxide (% Predicted).

Data displayed as median (range). Bold text indicates significant p-values <0.05. P-values were determined using t-tests.

**Table S5. Age at Onset and Diagnosis for Patients with Asymmetrical-Angiofibroma Mosaicism, Symmetrical-Angiofibroma Mosaicism, or Germline Tuberous Sclerosis Complex.**

|                       | Germline<br>(G)    | Sym-AF<br>Mosaic<br>(Sym) | Asym-AF<br>Mosaic<br>(Asym) | P-Values     |               |                  |
|-----------------------|--------------------|---------------------------|-----------------------------|--------------|---------------|------------------|
|                       |                    |                           |                             | G vs.<br>Sym | G vs.<br>Asym | Sym. vs.<br>Asym |
| 1st TSC Finding       | 0 (0-2)<br>n=28    | 0 (0-2)<br>n=12           | 9 (2-15)<br>n=6             | <i>0.942</i> | <b>0.042</b>  | <i>0.125</i>     |
| TSC Penetrance        | 4 (2-8)<br>n=27    | 10 (5-12)<br>n=11         | 24 (8-34)<br>n=7            | <b>0.045</b> | <b>0.043</b>  | <i>0.246</i>     |
| TSC Diagnosis         | 21 (4-31)<br>n=29  | 19 (13-35)<br>n=12        | 33 (17-41)<br>n=7           | <i>0.621</i> | <i>0.253</i>  | <i>0.592</i>     |
| 1st Dermatology Visit | 37 (31-46)<br>n=29 | 37 (25-40)<br>n=12        | 33 (27-41)<br>n=7           | <i>0.372</i> | <i>0.236</i>  | <i>0.592</i>     |
| LAM Symptom Onset     | 33 (27-38)<br>n=23 | 33 (31-34)<br>n=9         | 26 (24-31)<br>n=5           | <i>0.681</i> | <i>0.239</i>  | <i>0.364</i>     |
| LAM Diagnosis         | 36 (31-41)<br>n=23 | 33 (29-37)<br>n=11        | 31 (24-35)<br>n=5           | <i>0.403</i> | <i>0.215</i>  | <i>0.583</i>     |
| 1st PFT               | 37 (33-44)<br>n=23 | 36 (32-39)<br>n=11        | 35 (25-46)<br>n=5           | <i>0.363</i> | <i>0.413</i>  | <i>0.827</i>     |
| AML Diagnosis         | 30 (25-40)<br>n=24 | 36 (26-37)<br>n=10        | 31 (28-35)<br>n=6           | <i>0.838</i> | <i>0.667</i>  | <i>0.368</i>     |

Data displayed as median (interquartile range) number of years. Bold text indicates significant p-values <0.05. P-values were determined using Mann-Whitney test.

Abbreviations: Sym-AF, Symmetrical-Angiofibroma; Asym-AF, Asymmetrical-Angiofibroma; TSC, Tuberous Sclerosis Complex; LAM, Lymphangi leiomyomatosis; PFT, Pulmonary Function Testing; AML, Angiomyolipoma.

**Table S6. Variant Allele Fraction in Whole and Dissected Tumor Specimens From One Patient with Symmetrical-Angiofibroma Mosaicism (P05).**

| <b>Specimen</b> | <b>Whole Tumor<br/>VAF (%)</b> | <b>Specimen</b> | <b>Epidermis<br/>VAF (%)</b> | <b>Dermis<br/>VAF (%)</b> |
|-----------------|--------------------------------|-----------------|------------------------------|---------------------------|
| <b>AF1</b>      | 4.6                            | <b>AF5</b>      | 12.4                         | 12                        |
| <b>AF2</b>      | 7.6                            | <b>AF6</b>      | 3.6                          | 10.6                      |
| <b>AF3</b>      | 5.3                            | <b>AF7</b>      | 1.4                          | 10.9                      |
| <b>AF4</b>      | 5.4                            | <b>AF8</b>      | 1.1                          | 9.6                       |

Abbreviations: AF, Angiofibroma; VAF, Variant Allele Fraction.
